# Supplementary material for: Fibrillar pharmacology of functionalized nanocellulose
Source: PubMed Central journal article supplement (PMC7794391; doi:10.1038/s41598-020-79592-5), 2021-01-08

## **Fibrillar pharmacology of functionalized nanocellulose**

Sam Wong<sup>1,2,‡</sup>, Simone Alidori<sup>1,‡</sup>, Barbara P. Mello<sup>1</sup>, Bryan Aristega Almeida<sup>1</sup>, David Ulmert<sup>3</sup>, Matthew B. Brendel<sup>4</sup>, David A. Scheinberg<sup>3,5</sup>, and Michael R. McDevitt<sup>1,6,\*</sup>

<sup>1</sup> Department of Radiology, Memorial Sloan Kettering Cancer Center, New York, NY 10065.

<sup>2</sup> Department of Chemistry, Hunter College, New York, NY 10065.

<sup>3</sup> Molecular Pharmacology Program, Memorial Sloan Kettering Cancer Center, New York, NY 10065.

<sup>4</sup> Molecular Cytology Core Facility, Memorial Sloan Kettering Cancer Center, New York, NY 10065.

<sup>5</sup> Department of Pharmacology, Weill Cornell Medicine, New York, NY 10065.

<sup>6</sup> Department of Radiology, Weill Cornell Medical College, New York, NY 10065.

\* Corresponding author: Michael R. McDevitt, Ph.D., Department of Radiology, Memorial Sloan Kettering Cancer Center, 1275 York Avenue, Box 231, New York, New York 10065; (646) 888-2192 Tel.; (646) 422-0640 Fax; [mcdevitm@mskcc.org](mailto:mcdevitm@mskcc.org).

‡ These authors contributed equally to this work.

**Supplemental Figure 1.** FTIR Spectra of unmodified CNC, fCNC and EBEA.

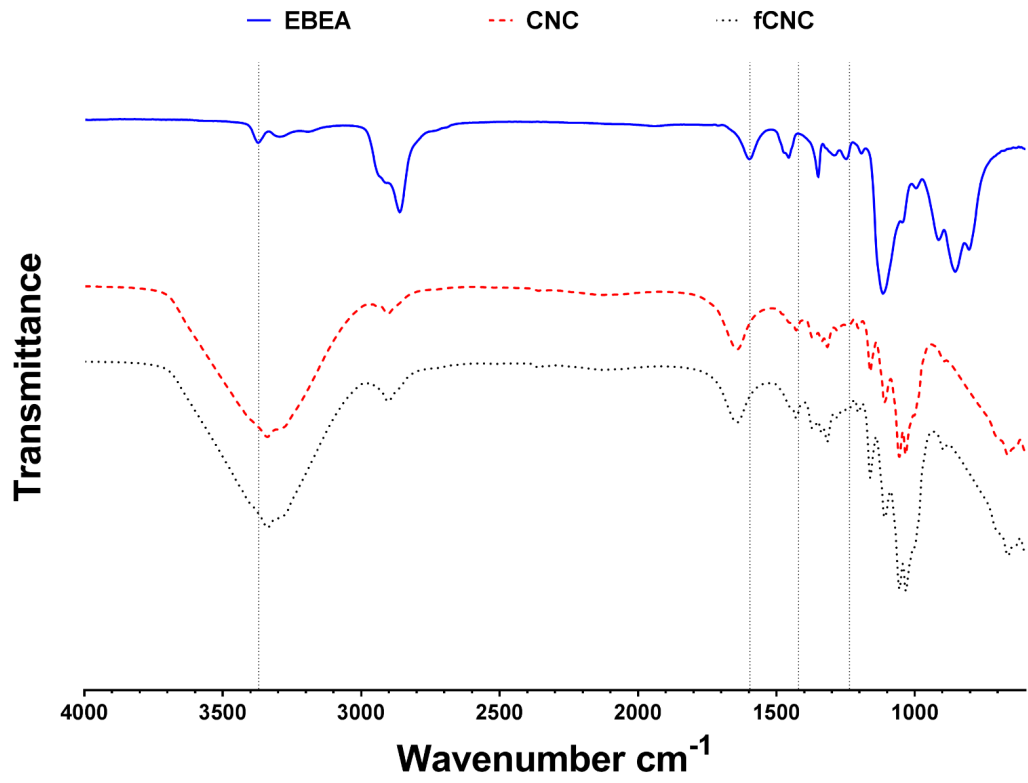

Supplement: 41598_2020_79592_MOESM1_ESM.pdf [file 41598_2020_79592_MOESM1_ESM.pdf]
